## EFFERENT REGULATION OF THE ABDOMINAL STRETCH RECEPTORS OF THE CRAYFISH

By O. B. ILYINSKY,\* D. L. SPIVACHENKO† AND E. I. SHTIRBU†

\* *Laboratory of General Physiology Reception, I.P. Pavlov Institute of Physiology, Academy of Sciences of the USSR, Leningrad,*

† *Laboratory of Neurophysiology, Institute of Zoology, Academy of Sciences of Moldavian SSR, Kishinev*

(Received 11 December 1973)

### SUMMARY

1. Efferent regulation of the activities of the slowly adapting and fast adapting stretch receptors (the  $MRO_1$  and  $MRO_2$ , respectively) of *Astacus fluviatilis* was studied.

2. It was shown that the receptors activity is under the efferent control of two central inhibitory neurones: the main inhibitory neurone (MIN) and the accessory neurone (AIN). Their activities were determined by the degree of discharge from the receptors.

3. There was close interaction between the  $MRO_1$  and the MIN. The activity of the MIN was determined by the activity of the  $MRO_1$  to a higher degree than vice versa; the activity of the MIN was influenced not only by the  $MRO_1$  impulses, but by the cessation of those impulses as well (silent periods). The  $MRO_1$  could inhibit or excite the MIN, whereas the MIN could inhibit the activity of the  $MRO_1$ .

4. Interaction between the  $MRO_1$  and the MIN could occur during background activity of the  $MRO_1$  or of the MIN. In both cases the activity of the initially non-active neurone appeared only after stimulation had been applied to the  $MRO_1$ .

5. Often each impulse of the  $MRO_1$  resulted in a MIN discharge of from 1 to 361 impulses. Sometimes the responses appeared after burst-discharges, induced by mechanical stimulation, of the otherwise inactive  $MRO_1$ .

6. During interaction between the  $MRO_1$  and the MIN, the neurone commencing activity had a higher discharge frequency, if only by 1-2 imp./sec, than the one firing previously.

7. Under the influence of MIN impulses the response of the  $MRO_1$  to stimulation changes from slowly adapting to fast-adapting.

8. The MIN has a slight inhibitory effect on the activity of the  $MRO_2$  which is most clearly seen in the course of background activity of the  $MRO_2$ . The  $MRO_2$ , however, does not exert much influence on the activity of the MIN.

9. The AIN had much less effect than the MIN on receptors, and the receptors did not naturally evoke AIN impulses. There is, therefore, apparently a more complicated connexion between the receptors and the AIN than between the receptors and the MIN.

## INTRODUCTION

The properties of mechanoreceptors have been the subject of many recent reviews (Kuffler, 1960; Matthews, 1964, 1972; Ilyinsky, 1967, 1972; Catton, 1970; Granit, 1970; Flock, 1971; Loewenstein, 1971; Ottoson & Shepherd, 1971). The stretch receptors of the crayfish have been one of the main objects of investigation, because they are very convenient for the study, not only of the primary processes of reception, but also of the efferent regulation of their activity. In spite of growing interest in the latter phenomenon (Eckert, 1961*a, b*; Fields, 1966; Fields, Evoy & Kennedy, 1967; Jansen, Njå & Walløe, 1970*a, b*; Jansen, Njå, Ormstad, Walløe & 1971*a, b, c*) many aspects of the problem are unresolved. The present study describes some features of efferent regulation in the activity of stretch receptors.

## MATERIALS AND METHODS

Experiments were performed on the freshwater crayfish (*Astacus fluviatilis*), either upon the intact nervous system or upon the abdominal nerve chain, after the connexion to the thorax had been severed. The forelegs were removed, and the abdomen was slightly curved by a special clamp and fastened to a stand. The abdomen was then dissected from the dorsal side to expose the receptor muscles and the dorsal nerve. The crayfish was immersed in van Harrevald's solution (van Harrevald, 1936) of the following content: NaCl, 12; KCl, 0.4; CaCl<sub>2</sub>, 1.5; MgCl<sub>2</sub>, 0.25 g/l. The solution was buffered to pH 7.2–7.4 with 0.01 M tris-buffer and saturated with oxygen before use. The temperature was 16–18 °C. Experiments typically lasted 3–4 h.

Receptor muscles of the 2nd–4th abdominal segments were held in a pair of forceps and connected to the output of a stimulator. The stimulator was as described by Spivachenko & Maximchuk (1968), and allowed the application of stimuli of various amplitudes, shapes and frequencies. Potentials of the intact dorsal nerve branch, connected to receptors and ganglion, were recorded with a thin platinum electrode: the grounded electrode was put in the bath containing the crayfish. The nerve was lifted from the solution into liquid paraffin for recording activity. Amplification was by means of a capacity-coupled preamplifier (UBP-02) and nerve impulses were displayed upon an oscilloscope, where they were photographed.

## RESULTS

*Identification of nerve response.* Various morphological and electrophysiological investigations (Alexandrowicz, 1951, 1967; Burgen, Kuffler, 1957; Eckert, 1961*a*; Jansen *et al.* 1971*a*) have shown that the nerve-branch connected to the abdominal stretch receptors consists of (1) two axons of slowly adapting and fast adapting stretch-receptors (called the MRO<sub>1</sub> and the MRO<sub>2</sub> respectively), (2) three efferent fibres of inhibitory neurons (thick, thin and very thin), (3) motor fibres of receptor muscles, and (4) nerve fibres of surrounding dorsal muscles.

In the activity of an intact nerve the following impulses were observed (see Figs. 1 and 2):

(1) Impulses of high amplitude, which quickly disappeared in the course of a long lasting stretch of moderate strength, and were absent during the background activity

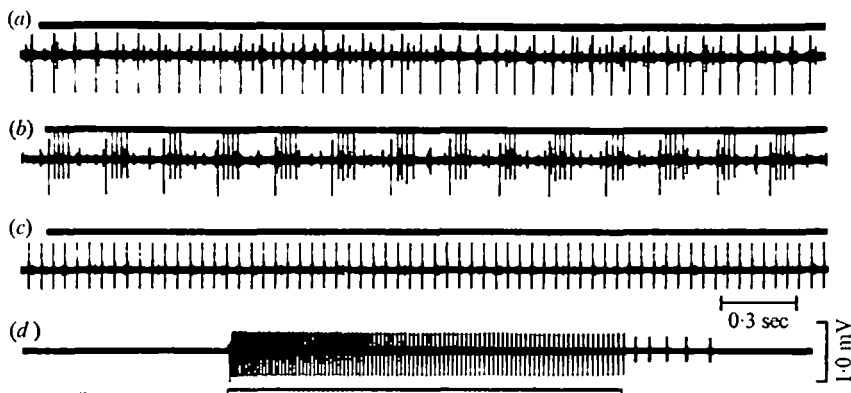

Fig. 1. Different patterns of activity of the  $MRO_1$  and the MIN. Low-amplitude impulses in (a-c) are due to the activity of nerve fibres connected with dorsal muscles. (a) Rhythmic (16 imp./sec) spontaneous activity of the  $MRO_1$ . (b) Low-frequency (4 imp./sec) spontaneous activity of the  $MRO_1$  and accompanying burst-impulses of the MIN. (c) High-frequency (19 imp./sec) spontaneous activity. (d) A burst-discharge of the  $MRO_1$  followed by responses of the MIN. The  $MRO_1$  discharge was in response to  $\square$ -like mechanical stimuli (interval indicated on bottom trace) applied to the receptor.

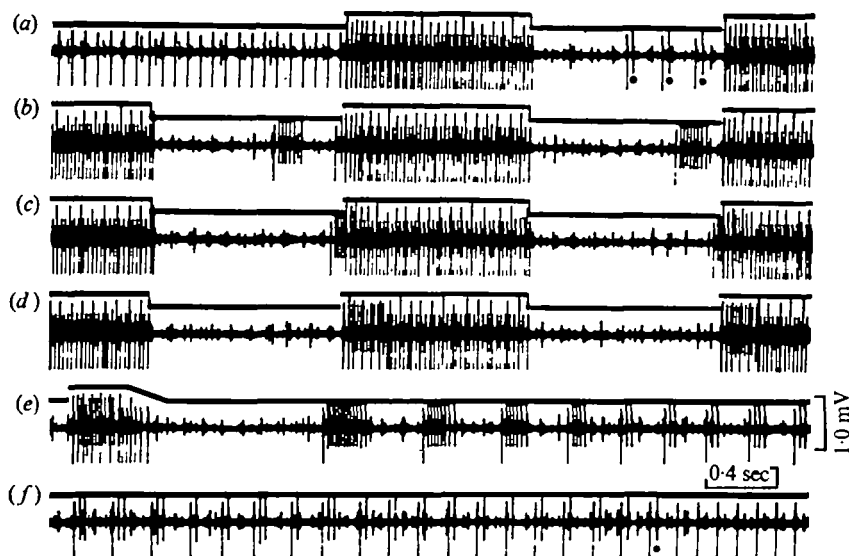

Fig. 2. Interaction between response of the MIN impulse of the  $MRO_1$  and the  $MRO_2$  in the course of background activity of the  $MRO_1$ . Top traces indicate the period of the mechanical stimulus. (a-e) Successive records of impulses of the  $MRO_1$  and the  $MRO_2$  in response to rhythmic stimulation (1 Hz), applied to receptor neurones. (e, f) The recovering activity of the  $MRO_1$  after the end of rhythmic stimulation.  $MRO_2$  spikes are observed only in the course of stimulation. Impulses of the MIN, marked by dots (a), occur only after the 'silent period' in the activity of the  $MRO_1$  (a-f). The moment of cessation of the MIN activity is marked by a dot (f).

of the nerve. These impulses appeared also in response to selective stimulation of the  $MRO_2$  and so this activity may be considered to be due to this sensory neurone.

(2) Impulses of an amplitude 1.5-2 times smaller than type 1, often observed as spontaneous background activity. This neurone slowly adapted during stimulation.

The impulses were observed during the selective stimulation of the  $MRO_1$  and are apparently a result of the activity of this sensory neurone.

(3) Impulses of a nearly equal or a bit lower amplitude than type 2, but with spikes of inverse phase. These impulses (and also the impulses of types 4 and 5) disappeared after the dorsal nerve had been cut and receptors were separated from the centre, which shows their efferent nature. The responses seemed to appear in the thick efferent fibre: the central neurone can be termed the main inhibitory neurone (the MIN). It is interesting to note that under certain conditions the MIN responded by continuously rhythmical impulses, which could fully inhibit the activity of the  $MRO_1$ .

(4) Quite irregular impulses of a low amplitude, which sometimes hardly rose above noise-level, in response to discharges from receptors. These impulses were not so regular as the MIN impulses and showed an essentially lower inhibitory effect on receptors; so they may be considered to result from the activity of the thin efferent fibre. The central unit of this fibre may be termed the accessory inhibitory neurone (the AIN).

(5) Low-amplitude impulses, which usually did not show any noticeable effect on the activity of either the receptor or the central neurone; these impulses may be considered to result from the activity of nerve fibres connected with surrounding dorsal muscles.

Our identification of the dorsal nerve impulses is in accord with the data of other authors (Burgin & Kuffler, 1957; Eckert, 1961*a*; Fields *et al.* 1967; Jansen *et al.* 1970*a*). However, we could not show which of the two thin fibres were active under the applied stimulation. Perhaps we recorded impulses of the thin fibre which has the greater effect on receptors (Jansen *et al.* 1971*a*).

*Interactions between activities of the  $MRO_1$  and the MIN.* It has been shown that a close interaction exists between central and receptor units. This interaction can be determined by functional features of the neurones. The closest interaction was observed between the  $MRO_1$  and the MIN. There are two main possibilities of interaction between the  $MRO_1$  and the MIN: (1) during the background resting activity of the  $MRO_1$  (when there was no activity in the MIN), and (2) in the course of the resting rhythmical activity of the MIN (when the activity of the  $MRO_1$  was absent) (Fig. 1*a, c*).

There exist two more cases of interaction between the  $MRO_1$  and the MIN. First, responses of the MIN to each spontaneous impulse of the  $MRO_1$  could be regularly observed; the duration of the responses could vary over a wide range (Fig. 1*b*). The changing activity of both neurones could be easily explained by the two main types of interaction between the  $MRO_1$  and the MIN proposed above. Secondly, an inactive neurone commenced activity only when the receptors were stimulated: impulses of the MIN were sometimes observed after the inactive  $MRO_1$  responded to stimulation of the receptors (Fig. 1*d*).

Figs. 2 and 3 represent the typical appearance of MIN responses during considerable background activity of the  $MRO_1$ . Impulses of the MIN were initially absent. This condition could last for a long time. When the stimulation was applied to the receptors the activity of the  $MRO_1$  increased and impulses of the  $MRO_2$  appeared. When the stimulation was off, there was a 'silent period' in the activity of the  $MRO_1$ , as a result of post-tetanic hyperpolarization of the receptors and also of the appearance of the hyperpolarization phase of the receptor potential (Eyzaguirre & Kuffler, 1955; Florey,

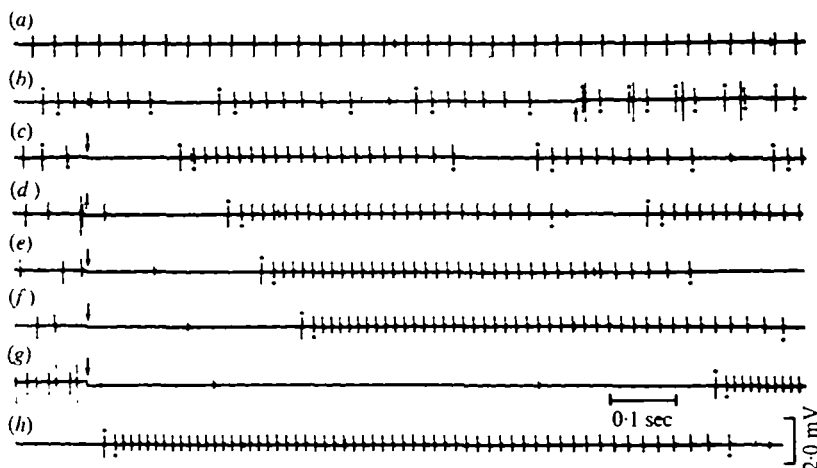

Fig. 3. Increasing discharge duration of the MIN in the course of rhythmical stimulation of receptors.  $\square$ -like stimulus is indicated by a small deflexion of the trace: an arrow from below indicates the start, and vice versa. The beginning and the end of a burst-discharge of the MIN are marked by dots from below; spontaneous impulses of the  $MRO_1$  are marked by dots from above.

(a) Spontaneous rhythmical activity of the  $MRO_1$ . (b) Burst-discharges of the MIN appear in response to rhythmical stimulation of receptors. Between the  $MRO_1$  and the MIN a rhythm of 1:1 is established;  $MRO_1$  spikes (high amplitude) appear but do not exert influence on the activity of the MIN. (c-f) Increased duration of the silent period after rhythmical stimuli of equal amplitudes were applied to the  $MRO_1$ , and the increased duration of the MIN burst-discharges in response to the very first impulse of the  $MRO_1$ . (g) Stimulation amplitude is 3 times as much as in (b-f); only the beginning of the MIN response is shown (to the right). The whole of the MIN response is shown (h). Low-amplitude responses are due to the activity of nerve fibres connected to dorsal muscles.

1956; Nakajima & Onodera, 1969). The duration of the 'silent period' depends, *ceteris paribus*, on the initial receptor excitability, which can be evaluated from the impulse frequency of the  $MRO_1$ . If the frequency of the background receptor activity increases, the 'silent period' duration shortens and vice versa. Recovery of the  $MRO_1$  activity occurred after the 'silent period' was over and if the pause lasted for a sufficiently long time there appeared some responses of the MIN to arising impulses of the  $MRO_1$ . If the stimulation was moderate, there appeared only one afferent impulse to each efferent signal (Fig. 2a). This 1:1 rhythm remained until the frequency of the afferent signals gradually increased and, at a certain moment, efferent impulses disappeared. Upon cessation of the MIN activity, the discharge frequency of the  $MRO_1$  significantly increased (Fig. 2f). Under intensified stimulation or when the excitability of the  $MRO_1$  lowered, for instance as a result of the MIN's activity, the duration of the silent period increased and each impulse of the  $MRO_1$  evoked the appearance of several spikes of the MIN: rhythms of 1:2, 1:3, 1:4, etc., could be observed (Fig. 3b). Such a rhythm was not constant; when the impulse frequency of the  $MRO_1$  became higher and approached its initial value, the burst-discharge duration of the MIN shortened and a full cessation of the efferent regulation was observed.

The duration of the silent period could also increase during rhythmical stimulation of the receptor. In our experiments we used the frequency of 1 imp/sec, which was not higher than the frequency of tail movements of a swimming crayfish. Under the applied stimulation the progressive prolongation of silent periods was accompanied by

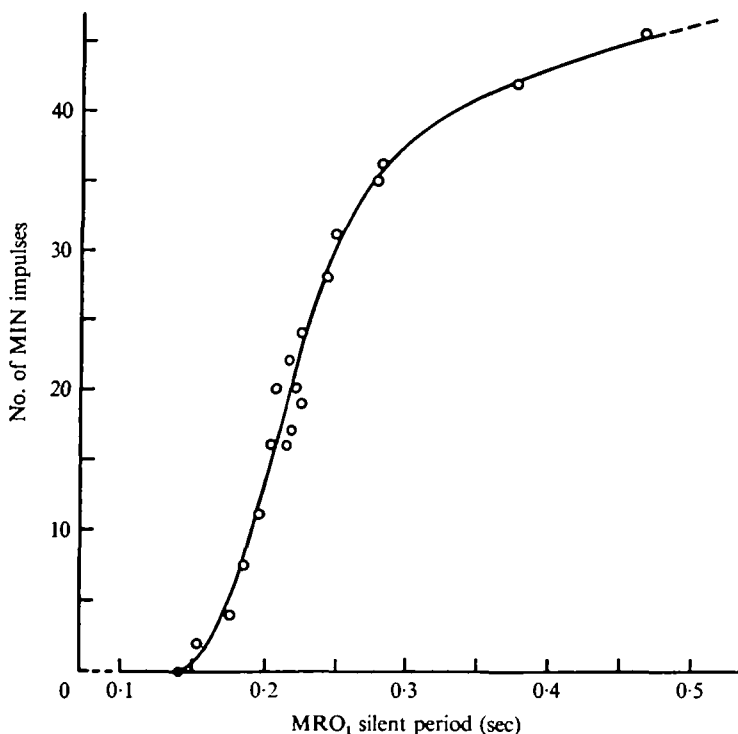

Fig. 4. Relationship between the duration of the MRO<sub>1</sub> silent period after stimulation and the number of impulses in the following MIN discharge.

an increase in the number of MIN impulses in response to the very first spike of the MRO<sub>1</sub> (Figs. 3c-g, 4).

If the silent period lasted for a relatively long time, the following stimulus superimposed on an efferent burst-discharge which appeared after the previous stimulation. Moreover, the MIN responses fully depressed the MRO<sub>1</sub> activity and lowered the MRO<sub>2</sub> impulse frequency (Fig. 2c). When the silent period duration was equal to the interval between stimuli, the activity remained constant: the very first response of the MRO<sub>1</sub> to the stimulus resulted in the appearance of the MIN activity. In its turn the central neurone produced spikes, which inhibited the activity of the MRO<sub>1</sub>. If the stimulus duration was relatively long, the activity of the MRO<sub>1</sub> appeared again after the end of the MIN discharge; the silent period could be observed, and then the whole process began again (Fig. 2d). When the rhythmical stimulation was over, there appeared the above-mentioned burst-discharge conditions of the MIN, but in each of the new burst-discharges the number of impulses decreased and the rhythm was at first 1:2, then 1:1 and at last the activity of the MIN was blocked completely (Fig. 2e, f).

The changing MIN responses appeared quite naturally in the course of recovering activity of the MRO<sub>1</sub>. Fig. 5 (values obtained from data presented in Fig. 2) displays indicators of the excitability of the MIN. The highest number of impulses and the lowest latency of the MIN were observed at the beginning of the stimulation, when intervals between discharges of the MRO<sub>1</sub> were the longest. Then, while the inter-

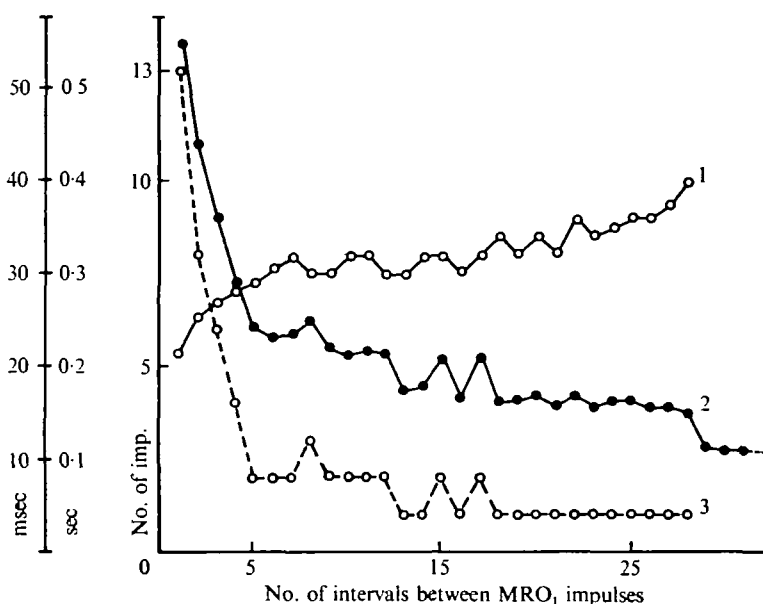

Fig. 5. Changes in nerve activity after the receptor was stimulated. (1) Latency (msec) of burst-discharges of the MIN. (2) Duration (sec) of intervals between impulses of the MRO<sub>1</sub>. (3) No. of impulses in bursts of the MIN.

spike duration of the MRO<sub>1</sub> shortened, the number of impulses in the MIN response decreased and the latency increased. This condition lasted until the MIN responses vanished completely. It is noticeable that even a slight change in interval between MRO<sub>1</sub> spikes produced a corresponding change in the number of impulses in the MIN discharge.

*After-effects of the MIN discharges.* MIN impulses instantaneously depress the activity of the MRO<sub>1</sub>. An inhibitory after-effect was also produced, but it was feebly marked and appeared only as a gradually changing excitability of the MRO<sub>1</sub> under the influence of a long-lasting discharge of the MIN. This was most clearly seen with the continuously high rhythmic activity of the MRO<sub>1</sub> during the recovery of excitability of the sensory neurone, after the end of the MIN discharge.

At the beginning of the experiment (Figs. 6, 7) responses of the MIN appeared only after the silent period was over. The duration of the silent period gradually increased in the course of rhythmical stimulation. The response of the MIN to the very first impulse of the MRO<sub>1</sub> increased simultaneously. However, the interval between the end of the MIN discharge and the appearance of the following impulse of the MRO<sub>1</sub> remained unchanged (82–86 msec) in all cases (Figs. 6a, 7A). It is necessary to note that this interval was considerably longer than the interval between impulses (45 msec) of the spontaneously active MRO<sub>1</sub> before the stimulation was applied to it. This difference in the duration of the interval is due to the change in excitability of the MRO<sub>1</sub>, which did not recover completely after the silent period and so the rhythm of the receptor activity was very slow. But when the receptor activity approximated to its initial level, intervals between inhibitory impulses and impulses of the MRO<sub>1</sub> were nearly equal to intervals between impulses of the MRO<sub>1</sub>.

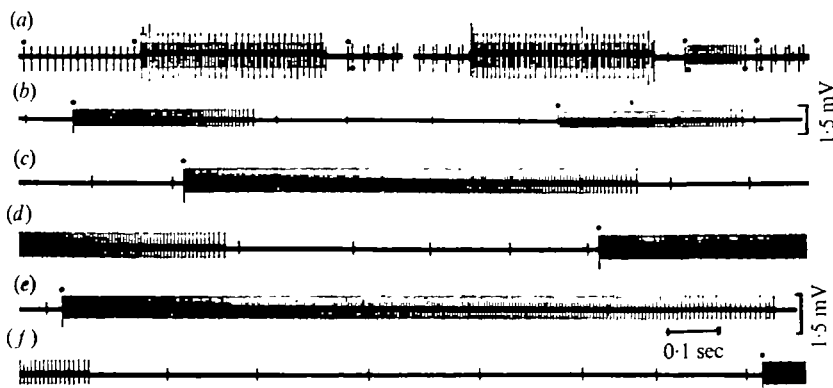

Fig. 6. Influence of MIN impulses on  $MRO_1$  excitability. The beginning (a), the middle (b-d) and the end (e-f) of an experiment that lasted for 2 h. The trace is deflected to indicate stimulation. Low-amplitude impulses are due to the activity of nerve fibres connected with dorsal muscles. In (c-f) amplification was increased.

(a, left) The beginning of rhythmical stimulation of receptors. Background activity is due to the  $MRO_1$ . Upon stimulation  $MRO_2$  impulses appeared. Some  $MRO_2$  impulses are blocked by impulses of the AIN. Each  $MRO_1$  impulse (dots above) evokes one MIN impulse (dot below) after stimulation has been removed. (a, right) The first  $MRO_1$  impulse evokes a burst-discharge of the MIN after the stimulus (the 12th). The rhythm between the  $MRO_1$  and the MIN then reverts to 1:1.

The interval between the end of the first discharge of the MIN and the appearance of the second impulse of the  $MRO_1$  does not depend on the number of impulses in the MIN response. (b, c, e) Powerful burst-discharges of the MIN. (b, d, f) Corresponding intervals between discharges of the MIN. In (d+f) only the end of the previous, and the beginning of the following, discharges are shown.

The inhibitory impulses of the MIN thus interrupted natural changes in the excitability of the  $MRO_1$ , but had no direct after-effect upon the activity of the sensory neurone. So, when the discharge of the MIN ceased, the activity of the  $MRO_1$  remained the same as at the beginning of the inhibitory burst-discharge.

In the middle of this experiment (Fig. 6b-d) and at the end of it (Fig. 6e-f) the excitability of the  $MRO_1$  gradually decreased and the frequency of spontaneously following discharges of the MIN considerably decreased. As the impulse frequency of the  $MRO_1$  decreased, the discharge duration of the MIN increased. Responses appeared to each afferent impulse, but there was no close relationship between the discharge rate of the MIN and the time of appearance of the following impulse of the  $MRO_1$  (Fig. 7B-D). For instance, after MIN discharges with quite different durations of 4800 and 6400 msec, the succeeding impulses of the  $MRO_1$  were at similar intervals to each other, being 4400 and 4080 msec, respectively. On the other hand, the decreasing impulse frequency of the  $MRO_1$  (i.e. the decreasing excitability of the receptor) and the increasing discharge duration of the MIN bore a closer relationship. Thus, in the middle of the experiment, when the discharge duration of the MIN was about 3000 msec, the average duration of the 'resting period' (i.e. the interval between the end of the MIN discharge and succeeding impulse of the  $MRO_1$ ) was about 2600 msec. At the end of the experiment the average discharge duration of the MIN was about 5300 msec, and the resting period lasted about 4300 msec (Fig. 6f). Therefore, although there is no direct connexion between the discharge duration of the MIN and the successive changing of the impulse frequency of the  $MRO_1$ , there is a connexion between changing excitabilities of the MIN and  $MRO_1$ .



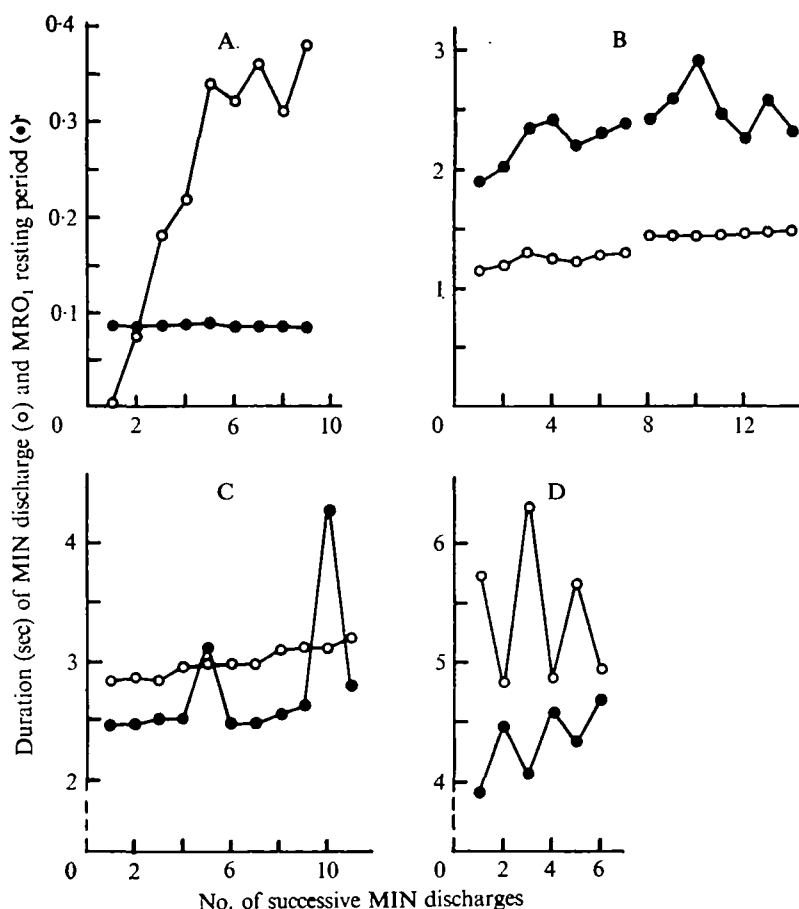

Fig. 7. Duration of MIN discharge and of the following 'resting period' in  $MRO_1$  activity. Data was obtained from the experiment shown in Fig. 6. Discontinuity in (B) is due to discontinuity in recording. (A) Start of application of stimuli at 1 Hz to the spontaneously active  $MRO_1$ . MIN responses appeared after the silent period in  $MRO_1$  activity (see Fig. 6a). (B-D) Different periods in the activity of neurones. The MIN responded by burst-discharges of increasing duration (see Fig. 6b-f).

*Interaction between the  $MRO_2$  and the MIN.* Unlike the  $MRO_1$ , the  $MRO_2$  had no noticeable effect upon the MIN. When  $MRO_2$  impulses appeared during MIN activity (Figs. 2, 3b, 8), the rhythm of the activity remained unchanged. The MIN, however, had some slight inhibitory effect on the  $MRO_2$ . This effect was most clearly observed in the course of long-lasting activity of the  $MRO_2$  and during continuous discharge of the MIN. It can be clearly seen in Fig. 2(b-e) and in Fig. 8; the latter shows that the rhythmical background activity of the  $MRO_2$  is gradually inhibited by successive burst-discharges of the MIN (the initial high-frequency part of the discharges produced the most effect).

*Excitation of the MIN after the cessation of activity of the  $MRO_1$  during its non-active state.* Sometimes, discharges of the MIN appeared after stimuli had been applied to the  $MRO_1$  during its non-active state (Fig. 1d). In the course of repeated rhythmical

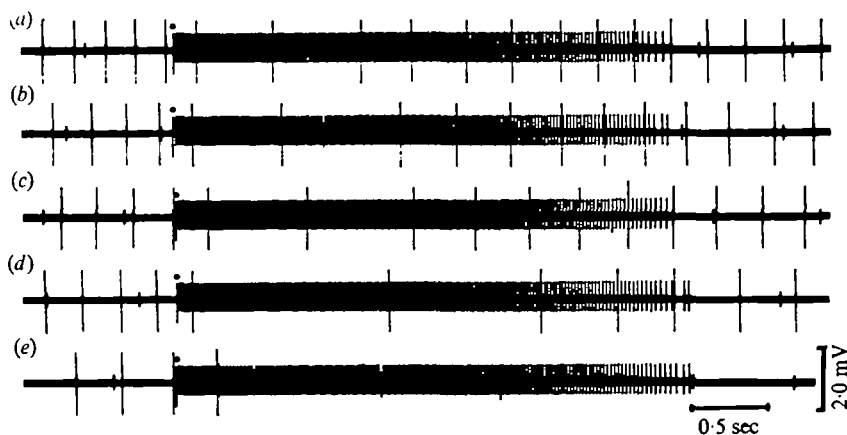

Fig. 8. Influence of successive long-lasting MIN discharges upon  $MRO_2$  activity. Each response of the  $MRO_1$  (dots above) evokes a long-lasting high-frequency discharge of the MIN. (a-e) Gradually increasing inhibition of the spontaneous rhythmic activity of the  $MRO_2$  (largest spikes) by the MIN burst-discharges.

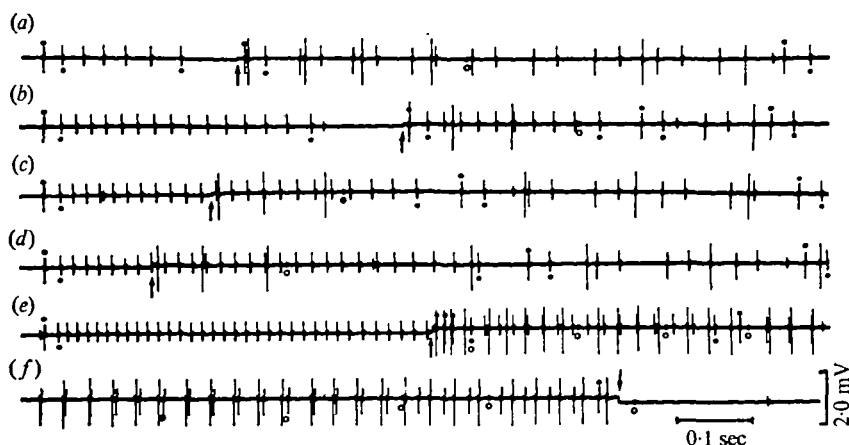

Fig. 9. Excitation of receptors in the course of rhythmic discharges of the MIN.

(a-e)  $MRO_1$  spikes (dots above) evoke burst or single discharges of the MIN. Dots below indicate the first and the last impulses of burst-discharges of the MIN. During receptor stimulation the dots mark only single spikes.  $MRO_2$  spikes have the highest amplitude, AIN spikes (open circles) the lowest. Arrow from below indicates start of stimulation, and vice versa.

(a-d) Responses of the  $MRO_1$  and the  $MRO_2$  to the beginning of  $\square$ -like mechanical stimuli of equal amplitudes. (e-f) The beginning (e) and the end (f) of a stimulus with an amplitude 3 times greater than in (a-d).

stimulation of the receptor the discharge value of the MIN progressively increased and latency decreased.

*Excitation of the  $MRO_1$  during resting burst-discharge activity of the MIN.* Sometimes, relatively constant burst-discharge conditions of the efferent neurone were observed; at each impulse from the receptor the MIN responded with about 3 or 4 impulses (Fig. 1 b). In some experiments bursts were much greater and could assume enormous proportions (Figs. 6, 8). The discharge frequency decreased exponentially. In one case we observed a discharge with a duration of 6.40 sec, which consisted of 361 impulses

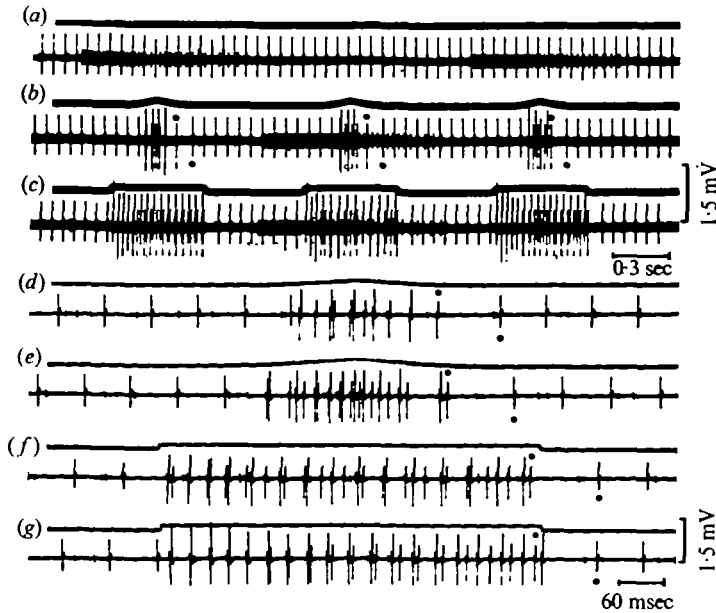

Fig. 10. Some features of receptor activity in the course of background activity of the MIN.

In (b-g), the largest impulses are  $MRO_1$  spikes. In (b, d-g), last impulses of the  $MRO_1$  in response to stimuli are marked by dots from above. First impulses of the MIN after the end of stimulation are marked by dots from below. Top trace shows mechanical stimuli of various types.

(a) Background MIN activity and spontaneous burst-discharges in nerve fibres connected with dorsal muscles. (b, c) The response of receptor neurones to repeated stimuli of various shapes. The activity of the MIN is immediately inhibited upon the discharges of receptor neurones. In (b, c, g) at the beginning of stimulation the increased amplitude of impulses is due to the compounding of impulses of both receptors.

And all this enormous efferent discharge appeared in response to only one afferent impulse!

Receptor stimulation during different periods of MIN activity revealed some features of the relationship between central and peripheral units (Figs. 9-11). In Fig. 9(a) can be seen the effect of applying stimulation immediately prior to the regularly appearing burst-discharges of the MIN. It is clear that if the first impulse of the  $MRO_1$  appeared 'suddenly' to the MIN it evoked only a single spike and not the usual burst-discharge of the efferent neurone. Following impulses of the  $MRO_1$  also evoked the appearance of only one spike of the MIN. After the period of stimulation, the first impulse of the  $MRO_1$  evoked a MIN discharge that lasted longer than the discharge before stimulation was applied to the receptor. Subsequent stimuli, which caused more and more prolonged silent periods, resulted in the appearance of more and more powerful MIN discharges. If the stimulation was applied to receptors immediately prior to the appearance of the regular  $MRO_1$  impulse, the first spike of the  $MRO_1$  evoked the appearance of MIN burst-impulses (Fig. 9b). During MIN activity,  $MRO_1$  responses were inhibited. After a MIN burst-discharge, the  $MRO_1$  responses appeared again, and each impulse of the  $MRO_1$  produced only one MIN spike. So, if the moderate stimulation was applied, not in the interval between burst-discharges, but during the discharge, the  $MRO_1$  did not respond until the cessation of the MIN responses

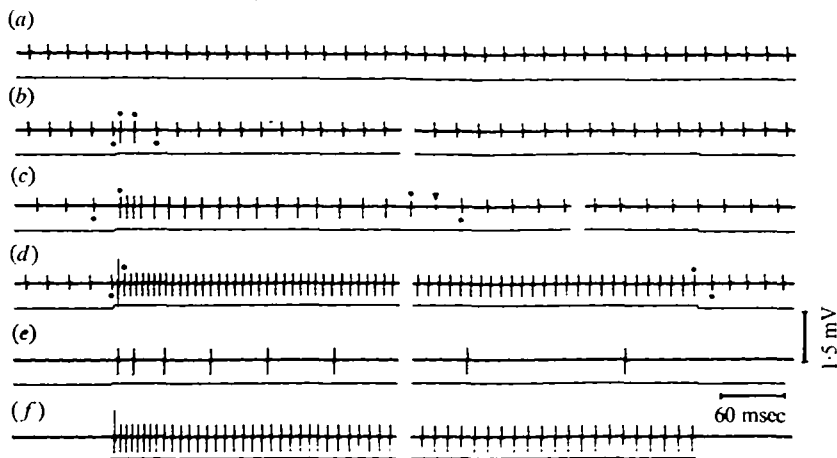

Fig. 11. Responses of the  $MRO_1$  to stimulation in the course of background activity of the MIN. The bottom trace indicates stimulation. In (b-d) the first impulse of the MIN (before stimulation is applied to receptors), and the last (after the cessation of the  $MRO_1$  activity), are marked by dots from below; the first and the last impulses of the  $MRO_1$  in response to stimulation are marked by dots from above. The change between  $MRO_1$  and MIN impulses is marked by an arrow in (c). In (d, f)  $MRO_1$  spikes are the largest.

(a) Background activity of the MIN. (b-d) Responses of receptors to stimulation in the course of rhythmical background activity of the MIN; stimulation amplitude was increased from (b) to (d). (e-f) Impulses of receptors after efferent fibres had been cut. Stimulation amplitude is the same in (e) as in (b), and in (f) as in (d).

(Fig. 9c, d). When the MIN activity was over, the  $MRO_1$  began to respond; each response produced one MIN impulse.

The burst-discharge of the MIN could, however, be interrupted by  $MRO_1$  impulses if a relatively high level of stimulation was applied to the receptor. Fig. 9(e) shows the beginning of such stimulation: three impulses of the  $MRO_1$  appeared simultaneously with the MIN discharge. MIN responses then ceased briefly and reappeared after the  $MRO_1$  activity.

In Fig. 9 it can be clearly seen that the  $MRO_2$  impulses, which appeared as a result of the receptor stimulation, did not influence the activity of the MIN and were not influenced by this neurone. Single impulses of the  $MRO_2$  were, however, blocked when the accessory inhibitory neurone (the AIN) was excited.

*Excitation of the  $MRO_1$  at the background of rhythmical impulses of the MIN.* In order to determine how  $MRO_1$  impulses could inhibit the MIN, stimulation was applied to the  $MRO_1$  during the background activity of the MIN (Figs. 10, 11). The appearance of the  $MRO_1$  responses, and accordingly the cessation of MIN activity, took place only when the discharge frequency of the  $MRO_1$  exceeded the impulse frequency of the MIN (if only by 1-2 imp./sec). The duration of the  $MRO_1$  response also depended on the initial impulse frequency of the MIN and the degree of stimulation (Fig. 11). Repeated bursts of rhythmical (1 Hz) stimulation decreased the duration of the response (Fig. 12A): the response of the  $MRO_1$  turned from the tonic to the phasic. The response could be converted back to the tonic by lowering the stimulation frequency and increasing the stimulus intensity. Naturally, the tonic response of the  $MRO_1$  remained constant if the efferent regulation of the MIN was eliminated (for example, by cutting the central part of the dorsal nerve; Fig. 11e, f). It is important to note that

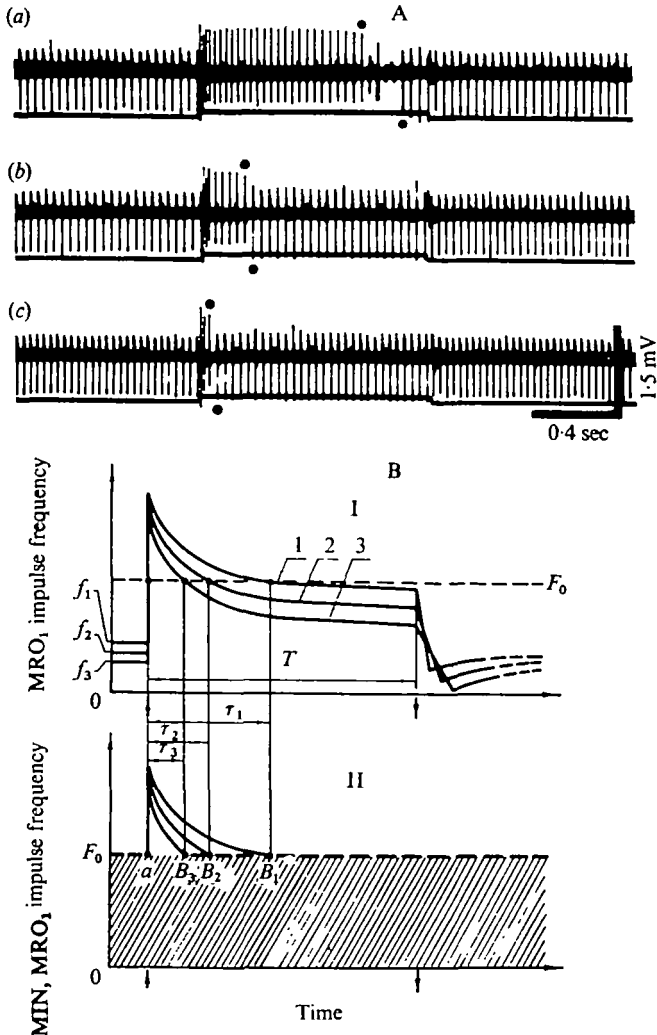

Fig. 12. Adaptation process of the MRO<sub>1</sub>.

(A) Changing responses of the MRO<sub>1</sub> to mechanical stimulation in the course of background activity of the MIN. The bottom trace indicates mechanical stimulation. The top trace displays nerve activity and is of inverted polarity to that in Figs. 1-11. The last response of the MRO<sub>1</sub> to stimulation is marked by a dot from above, the first impulse of the MIN after the end of MRO<sub>1</sub> discharges is marked by a dot from below. (a, b, c) Responses of the MRO<sub>1</sub> to rhythmical stimulation (1 Hz).

(B) Adaptation of the MRO<sub>1</sub> without (I) and during (II) background activity of the MIN. The beginning and the end of a stimulus with duration  $T$  are marked by arrows. 1, 2, 3, Changing discharge frequency curves of the MRO<sub>1</sub> in response to the first, the second and the third stimuli. MRO<sub>1</sub> predominates over MIN at  $a$ . Dominance is reversed in successive stimulations at  $B_1$ ,  $B_2$ ,  $B_3$  (time of adaptation,  $\tau_1$ ,  $\tau_2$ ,  $\tau_3$ , respectively).

the shortening of the MRO<sub>1</sub> response was accompanied by a decreased discharge frequency, and in all cases the cessation of the MRO<sub>1</sub> response occurred only after the impulse frequency of the MRO<sub>1</sub> had become lower than the impulse frequency of the MIN. In comparison, the rhythmical activity of the MIN (when stimulation was applied to the MRO<sub>1</sub>) was interrupted only when the discharge frequency of the MRO<sub>1</sub> became higher than that of the MIN.

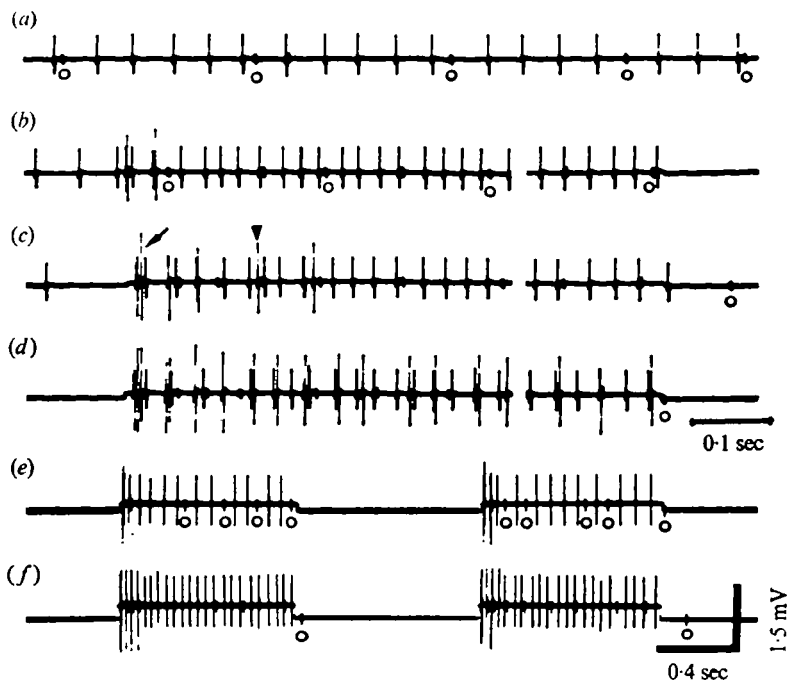

Fig. 13. Influence of the AIN on activities of the  $MRO_1$  and the  $MRO_2$ . Stimulation is indicated by a deflexion of the trace, which is of inverted polarity to that in Figs. 1-11. Spontaneous activity of the  $MRO_1$  was inhibited in the course of rhythmical stimulation in (d-f). Some impulses of the AIN are marked by open circles. High-amplitude impulses are  $MRO_2$  spikes: one is marked by the wide arrow on (c). Simultaneous occurrences of impulses is marked by oblique arrow.

(a) Alteration of the spontaneous activity of the  $MRO_1$  by impulses of the AIN. (b-d) Responses of the  $MRO_1$  and the  $MRO_2$  to successive  $\square$ -like stimuli of increasing amplitudes. Only the beginning and the end of stimulation are shown. (e-f) The same as in (b-d) but with a compressed time-scale. Stimulation amplitude was increased in (f).

The disappearance of  $MRO_1$  responses during stimulation (Figs. 11, 12A) could occur in two ways. First, when impulses of the  $MRO_1$  disappeared immediately, and impulses of the MIN appeared in replacement (Figs. 11b, 12A, B, C). Secondly, during a transitional period when both neurones either did not respond at all, or there appeared incomplete spikes (Figs. 11c, 12A, a). The appearance of incomplete spikes and the disappearance of impulses from both neurones is apparently due to the fact that the  $MRO_1$  and the MIN had the same discharge frequency: when impulses from the two neurones were recorded simultaneously the result was (by virtue of the similar size but converse phase of impulses) an illusion of the absence of responses.

Spontaneous switching from  $MRO_1$  activity to MIN activity and vice versa was sometimes observed. Cessation of the rhythmical activity of one neurone occurred suddenly, and it was immediately replaced by activity of the other, at a somewhat higher frequency. Impulse frequencies of the  $MRO_1$  and the MIN were so close to one another during long periods of time that this alteration gave the appearance of a reciprocal 'tuning' of both neurones.

*Influence of impulses of the AIN on receptor activity.* The activity of stretch receptors changed not only under the influence of MIN impulses, but also under the influen

of the accessory inhibitory neurone (the AIN). The AIN responses were observed, as a rule, during application of the stimulus to receptors, i.e. during the increased activity of the  $MRO_1$  and the  $MRO_2$  (Figs. 6*a*, 9, 13). They were also sometimes observed shortly after the end of the stimulus (Figs. 9*f*, 13*c, f*). Finally, impulses of the AIN could be traced in the course of spontaneous  $MRO_1$  activity (Fig. 13*a*).

Each impulse of the AIN appeared quite irregularly and showed roughly equal inhibitory effects on the activity of the  $MRO_1$  and the  $MRO_2$ . Whether single impulses were fully blocked or delayed was determined by the difference in time between the appearance of impulse of the AIN and the receptors (Figs. 9, 13).

Occurrence of the AIN impulses basically depended on  $MRO_1$  activity. However, in contrast to the MIN, the reflex responses of the AIN were not so exactly timed in relation to the  $MRO_1$  impulses. Therefore, the AIN impulses were recorded either preceding, following or even coinciding with the  $MRO_1$  and the  $MRO_2$  responses. Though the discharge frequency of the AIN increased with increasing activity of receptors, its inhibitory effect was lowered. This was offset by the increasing excitability of receptors; the possibility of coincidence in time of impulses of the AIN and the receptors, which resulted in the highest inhibitory effect, was lowered (compare *b, c*, and *d, e* and *f* on Fig. 13).

In spite of the, on the whole, irregular appearance of the AIN impulses, some regularity in the reflex activity of this neurone could be marked. Thus, impulses appeared in response to 3–5 impulses of receptors (the  $MRO_2$ , Fig. 9; or the  $MRO_1$ , Fig. 13*a–c*). Also a peculiarity in the activity of the AIN was the frequent occurrence of a single impulse when the stimulus applied to the receptors was switched off. Sometimes this impulse appeared with a delay of as much as about 50 msec (Figs. 6*a, 9f*, 13*c, f*).

*Activity of nerve fibres connected with dorsal muscles.* In practically all experiments there occurred discharges in the activity of the dorsal nerve which did not influence the activity of central and peripheral neurones. It could be supposed that these discharges were the result of the activity of nerve fibres connected to dorsal muscles. Nevertheless in rare cases when the activity was of a burst-like type it had some inhibitory effect on responses of the  $MRO_2$  (Fig. 10*b, c*). Fig. 10 shows the coincidence of  $MRO_2$  impulses with the low-amplitude discharge, which resulted either in blocking of the  $MRO_2$  impulse (*b*) or in lowering of the frequency of the receptor (*c*). Responses of the MIN and  $MRO_1$  during the discharge did not change at all (*a–c*). The nature of this influence upon the activity of the  $MRO_2$  remains obscure.

#### DISCUSSION

It was shown that the activity of the crayfish abdominal stretch receptors is under the effective control of central neurones. These neurones show only a slight effect on the activity of the  $MRO_2$  and are practically not influenced by this receptor. There is, however, a close reflex interaction between the  $MRO_1$  and the AIN. A relationship, to a lesser degree, was found between the  $MRO_1$  and the AIN. The MIN showed a greater effect than the AIN on the activity of receptors, which is in accord with the observations by Jansen (1971*b*).

Naturally, the MIN activity depends not only on the activity of ipsilateral stretch

receptors, but also on the other sensory inputs, for instance, the contralateral stretch receptors as shown by Jansen *et al.* (1970b). These authors demonstrated the close interaction between the MIN and the  $MRO_1$ , whereas the AIN activity depends apparently on the other contralateral inputs. Results obtained in the present study accord with these data.

In the interaction between  $MRO_1$  and the MIN, the MIN showed only an inhibitory effect, while the  $MRO_1$  exerted influence in two ways.  $MRO_1$  impulses could either excite the MIN or decrease, even to vanishing point, the activity of the MIN. Full inhibition of the MIN occurred if the impulse frequency of the  $MRO_1$  was rather high; it reappeared only after the pause in the activity of the  $MRO_1$  (the silent period). It is yet to be resolved if the origin of the reflex arc between the MIN and the  $MRO_1$  is monosynaptic (Jansen *et al.* 1970b) or polysynaptic (Eckert, 1961a). Therefore it is unknown if the dual influence of the  $MRO_1$  on the MIN is direct, or indirect with the help of interneurones. The high latency (14–41 msec) and the ability of the MIN to respond to a long-lasting discharge to only one afferent impulse suggests that there is polysynaptic connexion between the  $MRO_1$  and the MIN. On the other hand some experiments by Wachtel & Kandel (1967) demonstrated a monosynaptic reflex arc with a long synaptic delay in invertebrates, and it is difficult to deny the possibility of there being, in crayfish ganglia, efferent neurones possessing monosynaptic afferent connexions which respond to a long-lasting rhythmical discharge. It should also be taken into account that a single neurone of the invertebrate central nervous system can have either excitatory or inhibitory effect, depending only on the stimulus frequency (Wachtel & Kandel, 1967). In addition, the efficient interaction of the neurones observed in our experiments is an argument in favour of the presence of monosynaptic connections. Finally, morphological data (Czvilineva, 1970) shows that the crayfish ganglion connected with abdominal stretch receptors, as a rule contains a monosynaptic reflex arc without interneurones.

Even if some features in the interaction between the  $MRO_1$  and the MIN are still obscure, more is known about the switching between activity of these neurones. A neurone only commenced activity during, or instead of, the activity of another having a higher impulse frequency.

The role of impulse frequency in the interaction between the  $MRO_1$  and the MIN can be understood in the light of the adaptation process (Fig. 12B). As soon as the first stimulus of a rhythmical stimulation was applied to the receptor (Fig. 12B, a), the impulse frequency of the  $MRO_1$  quickly increased (curve 1, the initial frequency  $f_1$ ) and afterwards gradually decreased. When the stimulus ceased it became even lower, and then gradually grew to its initial value. Further stimuli evoked practically the same response, but if the interval between stimuli was made shorter than the period required for full recovery of activity of the receptor, then each new stimulus was applied before discharges of the  $MRO_1$  had increased to their initial value ( $f_1 > f_2 > f_3$ ).

During background activity of the MIN, with a discharge frequency  $F_0$ , the adaptation process of the  $MRO_1$  differed (Fig. 12B, II). The MIN would 'cut' lower and lower parts of the  $MRO_1$  activity curves during rhythmical stimulation (the level of  $F_0$  is shown with a dotted line in diagram I), leaving smaller and smaller periods during which the impulse frequency of the  $MRO_1$  exceeded the impulse frequency of the MIN. This interaction between discharge frequencies could be shown at variou



moments during the background activity of a neurone. It is possible that such an apparently simple yet effective mechanism of interaction between neurones can play an important role in the normal activity of the nervous system.

## REFERENCES

- ALEXANDROWICZ, J. S. (1951). Muscle receptor organs in the abdomen of *Homarus vulgaris* and *Palinurus vulgaris*. *J. microsc. Sci.* **92**, 163-99.
- ALEXANDROWICZ, J. S. (1967). Receptor organs in thoracic and abdominal muscles of Crustacea. *Biol. Rev.* **42**, 288-326.
- BURGEN, A. S. V. & KUFFLER, S. W. (1957). Two inhibitory fibers forming synapses with a single nerve cell in the lobster. *Nature, Lond.* **180**, 1490-1.
- CATTON, W. T. (1970). Mechanoreceptor function. *Physiol. Rev.* **50**, 297-318.
- CZVILINEVA, V. A. (1970). *On Evolution of the Brain of Arthropoda*. Leningrad: Nauka. (In Russian.)
- ECKERT, R. O. (1961a). Reflex relationships of the abdominal stretch receptors of the crayfish. I. Feed-back inhibition of the receptors. *J. cell. comp. physiol.* **57**, 149-62.
- ECKERT, R. O. (1961b). Reflex relationships of the abdominal stretch receptors of the crayfish. II. Stretch receptor involvement during the swimming reflex. *J. cell. comp. physiol.* **57**, 163-74.
- EYZAGUIRRE, C. & KUFFLER, S. W. (1955). Processes of excitation in the dendrites and in the soma of single isolated sensory nerve cells of lobster and crayfish. *J. gen. physiol.* **39**, 87-119.
- FIELDS, H. L. (1966). Proprioceptive control of posture in the crayfish abdomen. *J. exp. Biol.* **44**, 455-68.
- FIELDS, H. L., EVOY, W. G. & KENNEDY, D. (1967). Reflex role played by efferent control of an invertebrate stretch receptor. *J. Neurophysiol.* **30**, 859-74.
- FLOCK, A. (1971). Sensory transduction in hair cells. In *Handbook of Sensory Physiology. Principles of Receptor Physiology* (ed. W. R. Loewenstein), pp. 396-441. Berlin, New York: Springer-Verlag.
- FLOREY, E. (1956). Adaptationserscheinungen in den sensiblen Neuronen der Streckrezeptoren des Flusskrebses. *Z. Naturf.* **11b**, 504-13.
- GRANT, R. (1970). *The Basis of Motor Control*. London, New York: Academic Press.
- HARREVELD VAN A. (1936). A physiological solution for fresh water crustaceans. *Proc. soc. exp. biol. med. N.Y.* **34**, 428-32.
- ILYINSKY, O. B. (1967). *Studies on Physiology of Sensory System: Mechanoreceptors*. Leningrad: Nauka. (In Russian.)
- ILYINSKY, O. B. (1972). General physiology of receptors. In *Handbook of Physiology*. Vol. II. *Physiology of Sensory Systems* (ed. G. V. Gersuni), pp. 5-29. Leningrad: Nauka. (In Russian.)
- JANSEN, J. K. S., NJÅ, A. & WALLØE, L. (1970a). Inhibitory control of the abdominal stretch receptors of the crayfish. I. The existence of a double inhibitory feed-back. *Acta physiol. scand.* **80**, 420-5.
- JANSEN, J. K. S., NJÅ, A. & WALLØE, L. (1970b). Inhibitory control of the abdominal stretch receptors of the crayfish. II. Reflex input, segmental distribution and output relations. *Acta physiol. scand.* **80**, 443-9.
- JANSEN, J. K. S., NJÅ, A., ORMSTAD, K. & WALLØE, L. (1971a). On the innervation of the slowly adapting stretch receptor of the crayfish abdomen. An electrophysiological approach. *Acta physiol. scand.* **81**, 273-85.
- JANSEN, J. K. S., NJÅ, A., ORMSTAD, K. & WALLØE, L. (1971b). Inhibitory control of the abdominal stretch receptors of the crayfish. III. The accessory reflex as a recurrent inhibitory feed-back. *Acta physiol. scand.* **81**, 472-83.
- JANSEN, J. K. S., NJÅ, A., ORMSTAD, K. & WALLØE, L. (1971c). Inhibitory control of the abdominal stretch receptors of the crayfish. IV. Quantitative description of the central coupling of the accessory reflex. *Acta physiol. scand.* **81**, 484-91.
- KUFFLER, S. W. (1960). Excitation and inhibition in single nerve cells. In *The Harvey lectures*, ser. 54, 176-218. New York, London: Academic Press.
- LOEWENSTEIN, W. R. (1971). Mechano-electric transduction in the Pacinian corpuscle. Initiation of sensory impulses in mechano-receptors. In *Handbook of Sensory Physiology*. Vol. I. *Principles of Receptor Physiology* (ed. W. R. Loewenstein), pp. 269-90. Berlin, New York: Springer-Verlag.
- MATTHEWS, P. B. C. (1964). Muscle spindles and their motor control. *Physiol. Rev.* **44**, 219-88.
- MATTHEWS, P. B. C. (1972). *Mammalian Muscle Receptors and Their Central Actions*. London: Edward Arnold.
- NAKAJIMA, S. & ONODERA, K. (1969). Adaptation of the generator potential in crayfish stretch receptors under constant length and constant tension. *J. Physiol.* **200**, 187-204.
- NAKAJIMA, S. & TAKAHASHI, K. (1966). Post-tetanic hyperpolarization and electrogenic Na pump in stretch receptor neurone of crayfish. *J. Physiol.* **187**, 105-27.

- OTTOSON, D. & SHEPHERD, G. M. (1971). Transducer properties and integrative mechanisms in the frog's muscle spindle. In *Handbook of Sensory Physiology*. Vol. I. *Principles of Receptor Physiology* (ed. W. R. Loewenstein), pp. 442-99. Berlin, New York: Springer Verlag.
- SPIVACHENKO, D. L. & MAXIMCHUCK, G. G. (1968). Apparatus for applying of adequate stimuli to stretch receptors. In *Problems of Electrophysiology of Nerve Cells* (ed. A. A. Spassky), pp. 68-73. Kishinev. (In Russian.)
- WACHTEL, H. & KANDEL, E. R. (1967). A direct synaptic connection mediating both excitation and inhibition. *Science, N.Y.* **158**, 1206-8.
